# Supplementary material for: The second Met Office Unified Model/JULES Regional Atmosphere and Land configuration, RAL2
Source: Copernicus journal article supplement (doi:10.5194/gmd-2022-209), 2022-09-30
Supplement: Supplementary file [file gmd-2022-209-AC2-supplement.pdf]

| Statistics  | LIGHTNING |          |
|-------------|-----------|----------|
|             | RA1T      | RA2T     |
| RMSE        | 8.745589  | 8.336644 |
| Corr. Coef. | 0.032567  | 0.039343 |
| Bias        | 0.452464  | 0.299027 |
| Mult. Bias  | 1.673237  | 1.495751 |
| Mean Fcst   | 1.46396   | 1.310521 |
| Mean Obs    | 1.011495  | 1.011495 |
